# Supplementary material for: Two homochiral EuIII and SmIII enantiomeric pairs showing circularly polarized luminescence, photoluminescence and triboluminescence
Source: Royal Society of Chemistry journal article supplement (doi:10.1039/d0dt03576a), 2020-12-10
Supplement: d0dt03576a5.pdf [file d0dt03576a5.pdf]

## Supporting information for

### Two homochiral Eu<sup>III</sup> and Sm<sup>III</sup> enantiomeric pairs showing circularly polarized luminescence, photoluminescence and triboluminescence

Minghui Cui,<sup>a</sup> Ai-Ling Wang,<sup>a</sup> Cong-Li Gao,<sup>a</sup> Liming Zhou,<sup>a</sup> Tao Wu,<sup>\*b</sup> Shaoming Fang<sup>a</sup> Hong-Ping Xiao,<sup>\*c</sup> Feng-Cai Li and Xi-Li Li,<sup>\*a</sup>

<sup>a</sup> Henan Provincial Key Laboratory of Surface and Interface Science, Zhengzhou University of Light Industry, Zhengzhou 450002, P. R. China; Email: lixl@zzuli.edu.cn

<sup>b</sup> Institute of Organic Chemistry and Biochemistry, Czech Academy of Sciences, Flemingovo náměstí 2, 16610 Prague 6, Czech Republic; Email: wu@uochb.cas.cz

<sup>c</sup> College of Chemistry & Material Engineering, Wenzhou University, Wenzhou 325035, P. R. China; Email: hp\_xiao@126.com

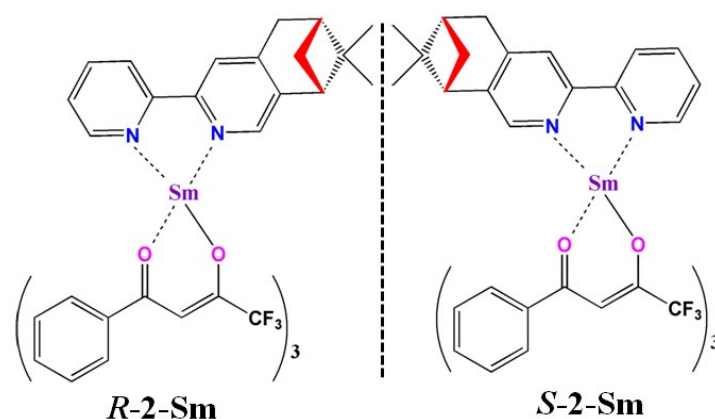

**Scheme S1** Chemical structures of homochiral *R*-2-Sm/*S*-2-Sm.

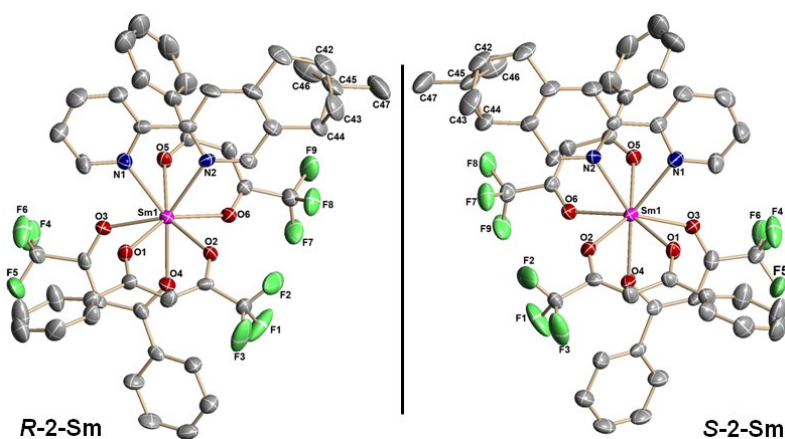

**Fig. S1** Molecular structures of homochiral ***R*-2-Sm** and ***S*-2-Sm** enantiomeric pairs (ORTEP at 30% probability); H atoms are omitted for clarity.

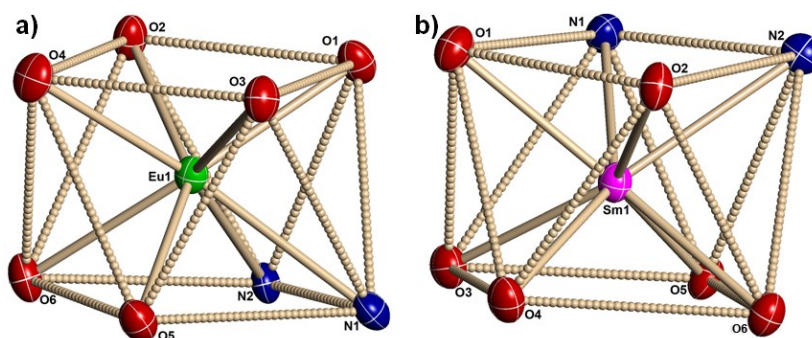

**Fig. S2** Coordination geometries of Eu1 in ***R*-1-Eu** (a) and Sm1 in ***R*-2-Sm** (b).

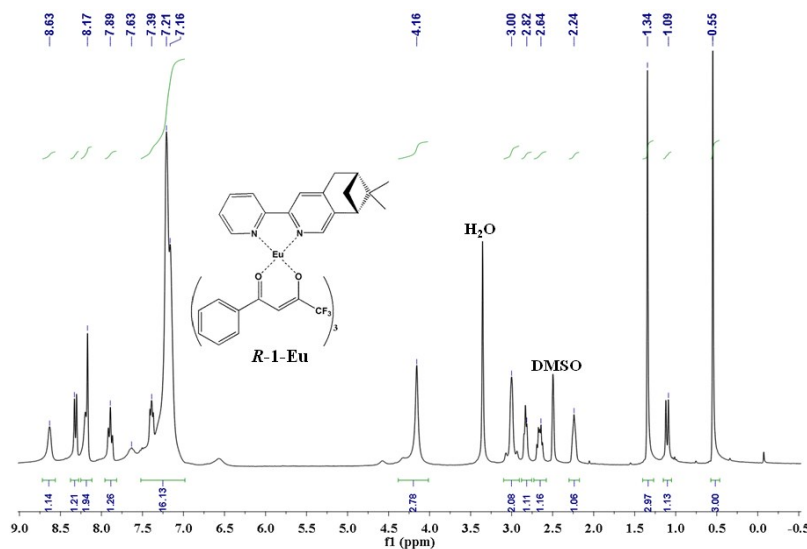

**Fig. S3**  $^1\text{H}$  NMR of ***R*-1-Eu** in  $\text{DMSO-}d_6$ . The NMR spectra for the homochiral  $\text{Eu}^{\text{III}}$  enantiomeric pairs are identical as expected.

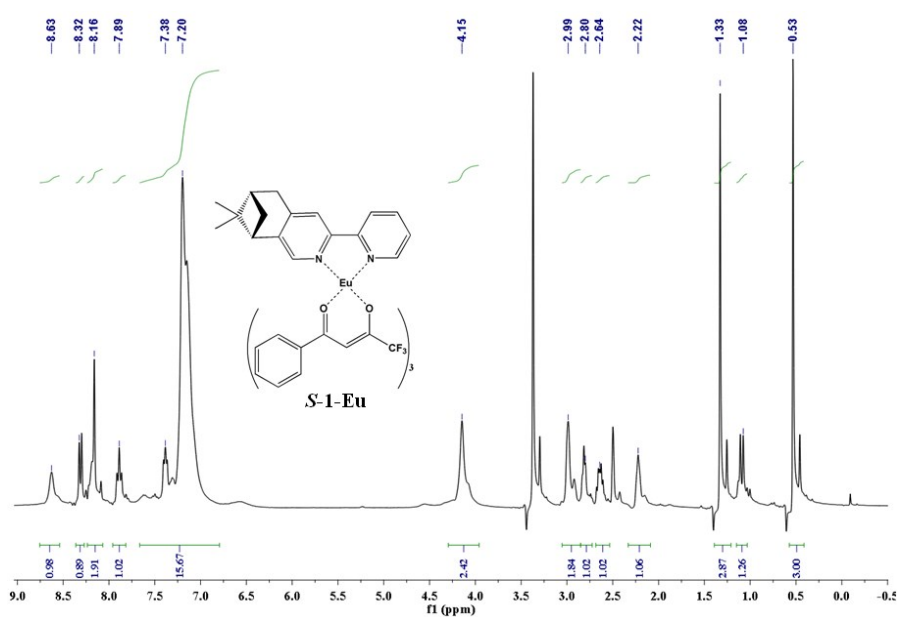

**Fig. S4**  $^1\text{H}$  NMR of **S-1-Eu** in  $\text{DMSO-}d_6$ . The NMR spectra for the homochiral  $\text{Eu}^{\text{III}}$  enantiomeric pairs are identical as expected.

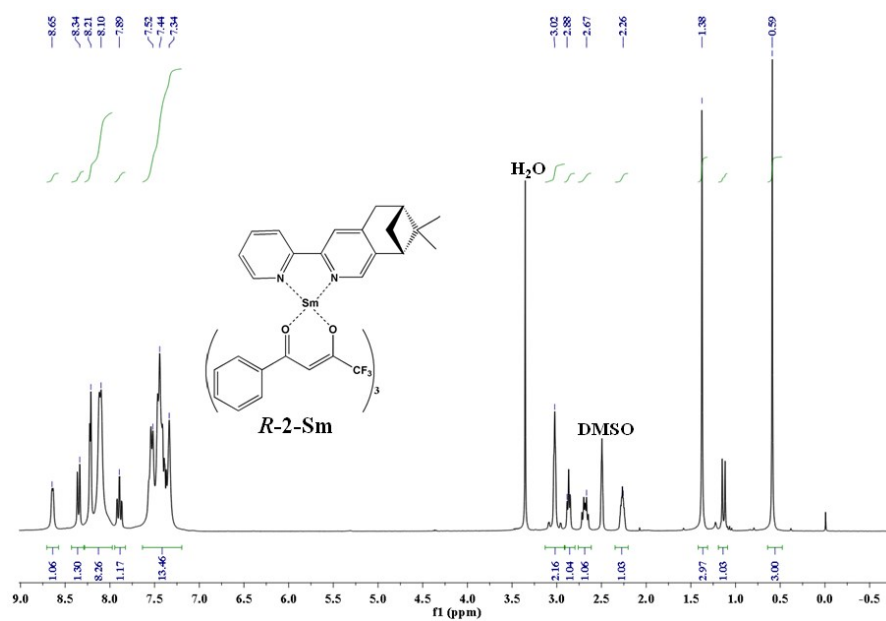

**Fig. S5**  $^1\text{H}$  NMR of **R-2-Sm** in  $\text{DMSO-}d_6$ . The NMR spectra for the homochiral  $\text{Sm}^{\text{III}}$  enantiomeric pairs are identical as expected.

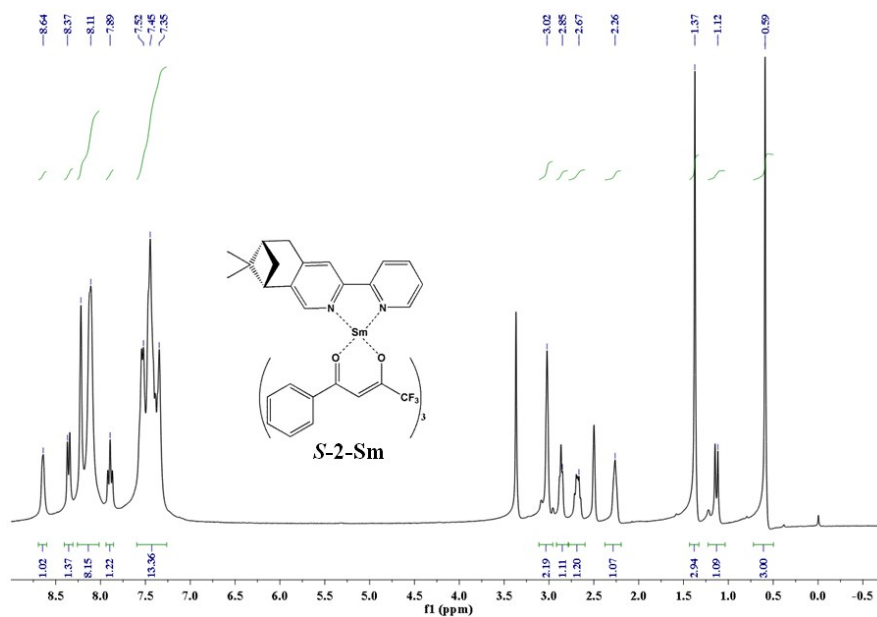

**Fig. S6**  $^1\text{H NMR}$  of **S-2-Sm** in  $\text{DMSO-}d_6$ . The NMR spectra for the homochiral  $\text{Sm}^{\text{III}}$  enantiomeric pairs are identical as expected.

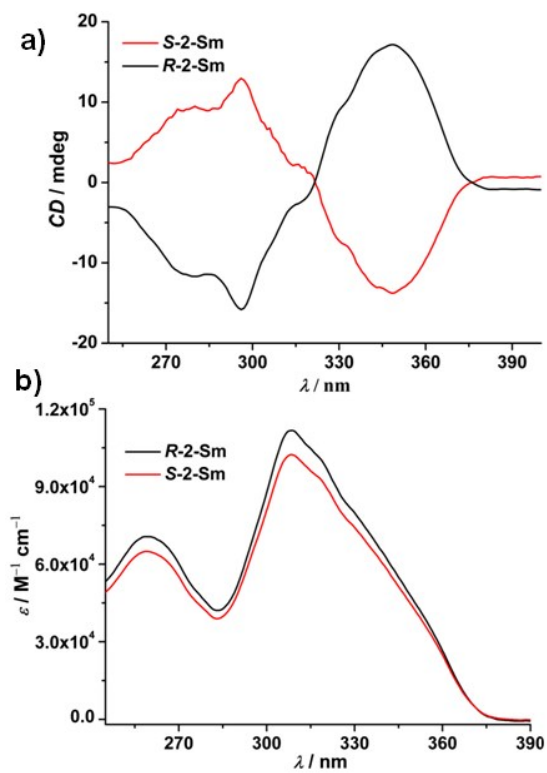

**Fig. S7** (a) Electronic circular dichroism (ECD) spectra and (b) UV-Vis absorption spectra of homochiral **R-2-Sm** and **S-2-Sm** enantiomeric pairs in  $\text{DCM}$  ( $1 \times 10^{-5} \text{ M}$ ).

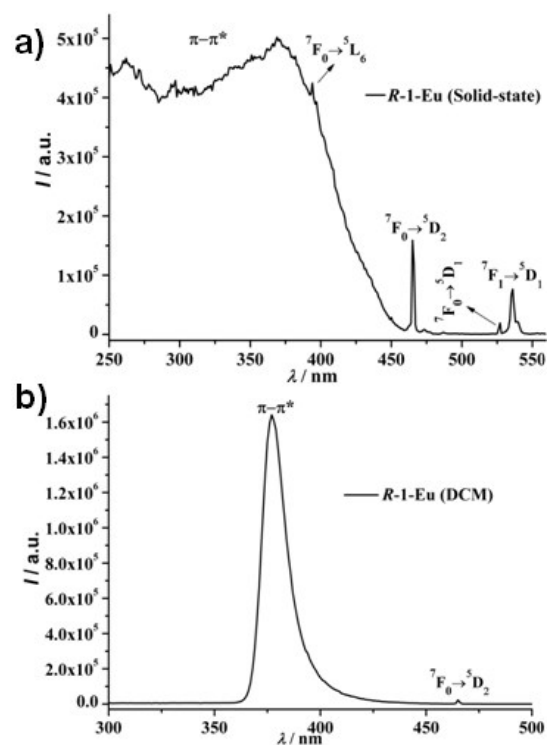

**Fig. S8** The excitation spectra of **R-1-Eu** in the solid state ( $\lambda_{em} = 613$  nm) (a) and in DCM ( $1 \times 10^{-5}$  M,  $\lambda_{em} = 612$  nm) (b).

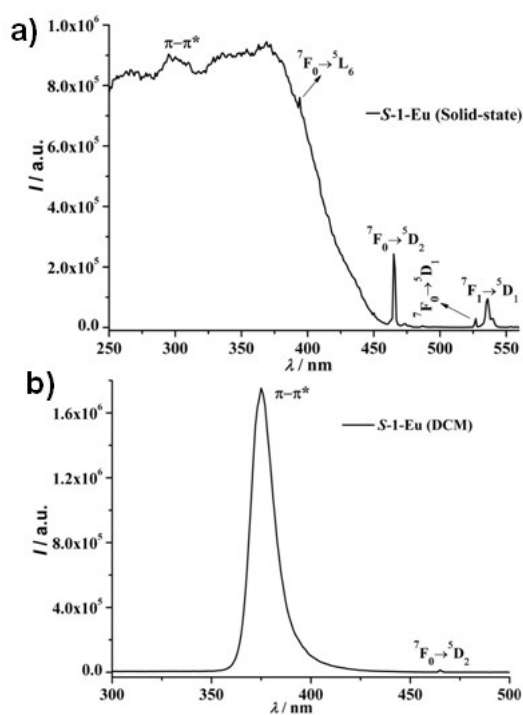

**Fig. S9** The excitation spectra of **S-1-Eu** in the solid state ( $\lambda_{em} = 613$  nm) (a) and in DCM ( $1 \times 10^{-5}$  M,  $\lambda_{em} = 612$  nm) (b).

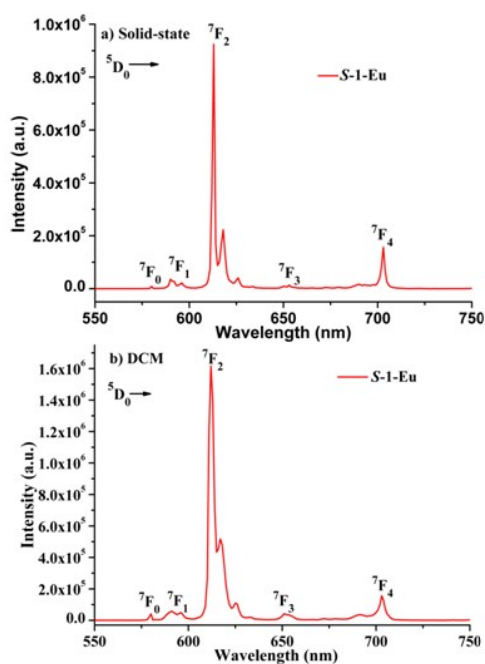

**Fig. S10** Emission spectra of **S-1-Eu** in solid state ( $\lambda_{\text{ex}} = 370$  nm) (a) and in DCM ( $1 \times 10^{-5}$  M,  $\lambda_{\text{ex}} = 377$  nm) (b) at room temperature.

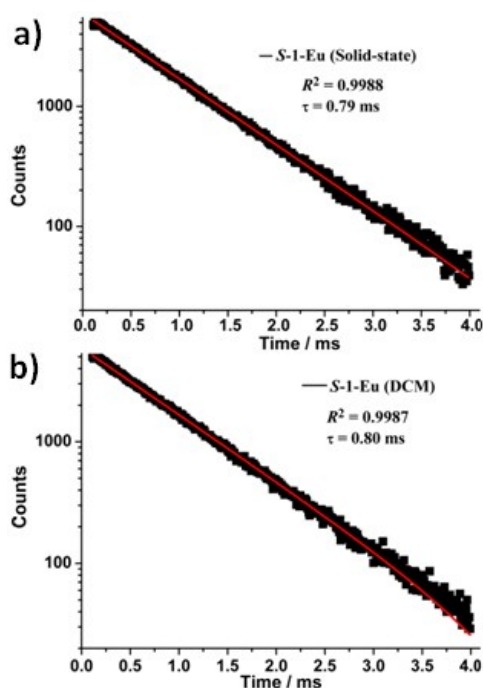

**Fig. S11** Decay curves of **S-1-Eu** with fitted curves (red) in the solid state (a) and in DCM ( $1 \times 10^{-5}$  M) (b) at room temperature. Decay curves presented with log ordinate scale.

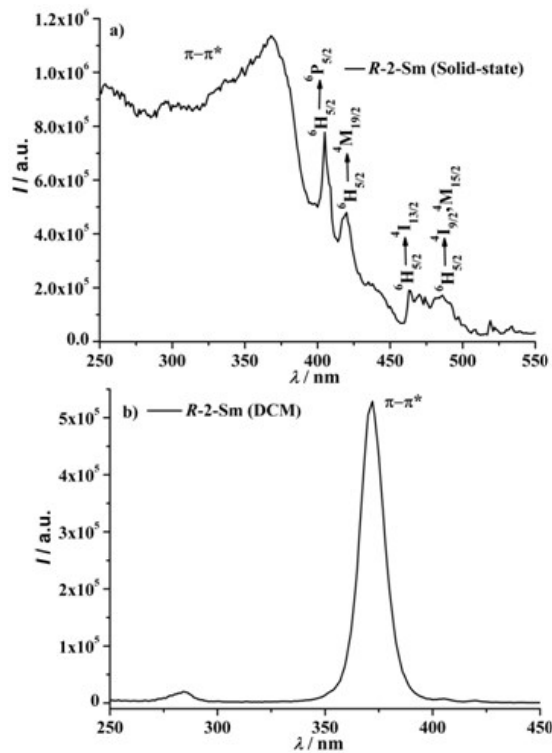

**Fig. S12** The excitation spectra of *R-2-Sm* in the solid state ( $\lambda_{em} = 647$  nm) (a) and in DCM ( $3 \times 10^{-5}$  M,  $\lambda_{em} = 647$  nm) (b).

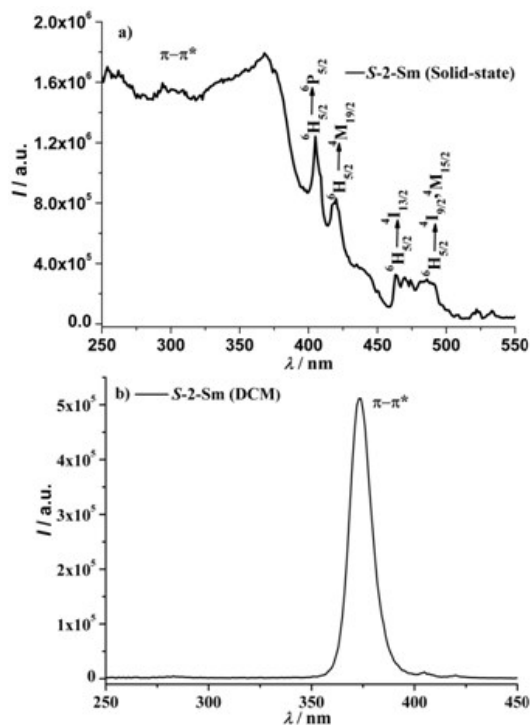

**Fig. S13** The excitation spectra of *S-2-Sm* in the solid state ( $\lambda_{em} = 647$  nm) (a) and in DCM ( $3 \times 10^{-5}$  M,  $\lambda_{em} = 647$  nm) (b).

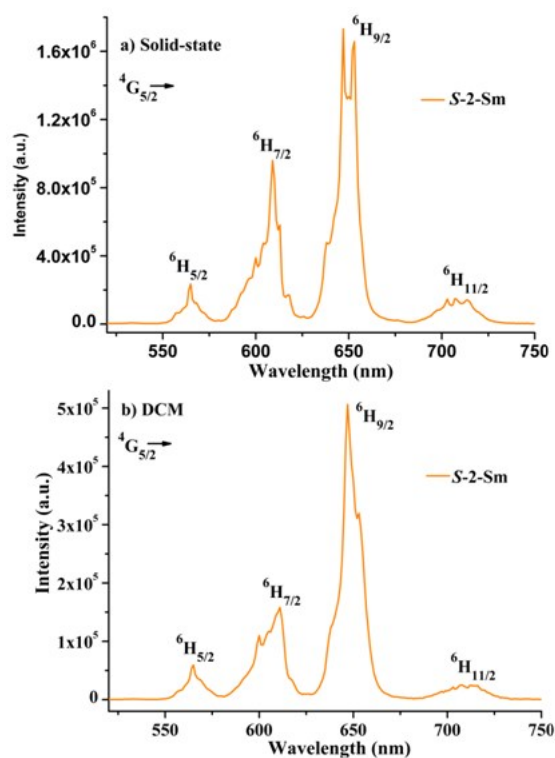

**Fig. S14** Emission spectra of S-2-Sm in the solid state ( $\lambda_{\text{ex}} = 370$  nm) (a) and in DCM ( $3 \times 10^{-5}$  M,  $\lambda_{\text{ex}} = 370$  nm) (b) at room temperature.

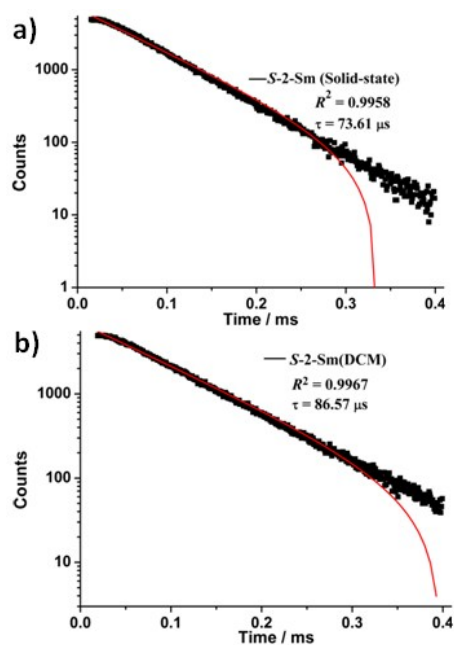

**Fig. S15** Decay curves of S-2-Sm with fitted curves (red) in the solid state (a) and in DCM ( $3 \times 10^{-5}$  M) (b) at room temperature. Decay curves presented with log ordinate scale.



**Table S1** Crystallographic data and structure refinement parameters for both **R-1-Eu/S-1-Eu** and **R-2-Sm/S-2-Sm** enantiomeric pairs.

|                                                                          | <b>R-1-Eu</b>                                                                   | <b>S-1-Eu</b>                                                                   | <b>R-2-Sm</b>                                                                   | <b>S-2-Sm</b>                                                                   |
|--------------------------------------------------------------------------|---------------------------------------------------------------------------------|---------------------------------------------------------------------------------|---------------------------------------------------------------------------------|---------------------------------------------------------------------------------|
| Chemical formula                                                         | C <sub>47</sub> H <sub>36</sub> F <sub>9</sub> N <sub>2</sub> O <sub>6</sub> Eu | C <sub>47</sub> H <sub>36</sub> F <sub>9</sub> N <sub>2</sub> O <sub>6</sub> Eu | C <sub>47</sub> H <sub>36</sub> F <sub>9</sub> N <sub>2</sub> O <sub>6</sub> Sm | C <sub>47</sub> H <sub>36</sub> F <sub>9</sub> N <sub>2</sub> O <sub>6</sub> Sm |
| Formula weight                                                           | 1047.74                                                                         | 1047.74                                                                         | 1046.13                                                                         | 1046.13                                                                         |
| Crystal system                                                           | triclinic                                                                       | triclinic                                                                       | triclinic                                                                       | triclinic                                                                       |
| Space group                                                              | <i>P1</i>                                                                       | <i>P1</i>                                                                       | <i>P1</i>                                                                       | <i>P1</i>                                                                       |
| <i>a</i> /Å                                                              | 10.6976(9)                                                                      | 10.7349(3)                                                                      | 10.6922(7)                                                                      | 10.7328(4)                                                                      |
| <i>b</i> /Å                                                              | 10.7310(6)                                                                      | 10.7689(2)                                                                      | 10.7184(9)                                                                      | 10.7633(4)                                                                      |
| <i>c</i> /Å                                                              | 11.1962(9)                                                                      | 11.1509(4)                                                                      | 11.1514(8)                                                                      | 11.2076(4)                                                                      |
| $\alpha$ /°                                                              | 83.744(5)                                                                       | 83.873(2)                                                                       | 83.872(7)                                                                       | 83.741(3)                                                                       |
| $\beta$ /°                                                               | 66.703(8)                                                                       | 66.744(3)                                                                       | 66.808(6)                                                                       | 66.691(4)                                                                       |
| $\gamma$ /°                                                              | 73.668(6)                                                                       | 74.512(2)                                                                       | 74.017(7)                                                                       | 73.880(4)                                                                       |
| <i>V</i> /Å <sup>3</sup>                                                 | 1132.85(16)                                                                     | 1141.33(6)                                                                      | 1129.30(16)                                                                     | 1142.29(8)                                                                      |
| <i>Z</i>                                                                 | 1                                                                               | 1                                                                               | 1                                                                               | 1                                                                               |
| <i>D</i> /g cm <sup>-3</sup>                                             | 1.536                                                                           | 1.524                                                                           | 1.538                                                                           | 1.521                                                                           |
| $\mu$ /mm <sup>-1</sup>                                                  | 1.471                                                                           | 1.460                                                                           | 1.387                                                                           | 1.371                                                                           |
| GOF                                                                      | 1.000                                                                           | 0.965                                                                           | 1.038                                                                           | 1.023                                                                           |
| <i>R</i> <sub>1</sub> <sup>a</sup> / <i>wR</i> <sub>2</sub> <sup>b</sup> | 0.0408 / 0.0892                                                                 | 0.0357 / 0.0708                                                                 | 0.0369 / 0.0770                                                                 | 0.0391 / 0.0718                                                                 |
| Flack parameter                                                          | 0.009(14)                                                                       | 0.0100(11)                                                                      | 0.014(10)                                                                       | 0.011(10)                                                                       |

<sup>a</sup>  $R_1 = \sum ||F_o| - |F_c|| / \sum |F_o|$ . <sup>b</sup>  $wR_2 = [\sum w(F_o^2 - F_c^2)^2 / \sum w(F_o^2)^2]^{1/2}$

**Table S2.** Selected bond lengths (Å) and angles (°) for **R-1-Eu** and **S-1-Eu**.

| <b>R-1-Eu</b>    |          |                 |         | <b>S-1-Eu</b>    |          |                 |            |
|------------------|----------|-----------------|---------|------------------|----------|-----------------|------------|
| Bond lengths (Å) |          | Bond angles (°) |         | Bond lengths (Å) |          | Bond angles (°) |            |
| Eu1–N1           | 2.560(9) | O1–Eu1–N1       | 73.8(2) | Eu1–N1           | 2.626(6) | O2–Eu1–N2       | 80.72(18)  |
| Eu1–N2           | 2.586(7) | O1–Eu1–N2       | 76.1(2) | Eu1–N2           | 2.625(6) | O2–Eu1–N1       | 132.96(18) |
| Eu1–O1           | 2.362(6) | O1–Eu1–O2       | 71.1(2) | Eu1–O1           | 2.415(5) | O2–Eu1–O1       | 70.19(17)  |
| Eu1–O2           | 2.362(6) | O5–Eu1–N1       | 74.0(3) | Eu1–O2           | 2.402(5) | O6–Eu1–N2       | 76.34(18)  |
| Eu1–O3           | 2.359(6) | O6–Eu1–O5       | 71.4(2) | Eu1–O3           | 2.396(5) | O5–Eu1–O6       | 70.75(17)  |
| Eu1–O4           | 2.359(7) | N1–Eu1–N2       | 62.1(2) | Eu1–O4           | 2.407(5) | N1–Eu1–N2       | 61.3(2)    |
| Eu1–O5           | 2.374(7) |                 |         | Eu1–O5           | 2.416(5) |                 |            |
| Eu1–O6           | 2.344(6) |                 |         | Eu1–O6           | 2.385(5) |                 |            |

**Table S3.** Selected bond lengths (Å) and angles (°) for **R-2-Sm** and **S-2-Sm**.

| <b>R-2-Sm</b>    |          |                 |           | <b>S-2-Sm</b>    |          |                 |           |
|------------------|----------|-----------------|-----------|------------------|----------|-----------------|-----------|
| Bond lengths (Å) |          | Bond angles (°) |           | Bond lengths (Å) |          | Bond angles (°) |           |
| N1–Sm1           | 2.580(7) | O5–Sm1–N2       | 76.1(2)   | N1–Sm1           | 2.602(7) | O5–Sm1–N1       | 73.3(2)   |
| N2–Sm1           | 2.584(6) | O5–Sm1–N1       | 73.8(2)   | N2–Sm1           | 2.602(7) | O5–Sm1–N2       | 76.06(19) |
| O1–Sm1           | 2.394(6) | O5–Sm1–O6       | 70.77(19) | O1–Sm1           | 2.393(6) | O5–Sm1–O3       | 77.85(18) |
| O2–Sm1           | 2.354(6) | O2–Sm1–O1       | 71.16(19) | O2–Sm1           | 2.365(5) | O1–Sm1–O2       | 71.47(19) |
| O3–Sm1           | 2.364(5) | O1–Sm1–N1       | 73.9(2)   | O3–Sm1           | 2.373(5) | O2–Sm1–N2       | 75.37(19) |
| O4–Sm1           | 2.368(6) | N1–Sm1–N2       | 62.2(2)   | O4–Sm1           | 2.379(6) | N1–Sm1–N2       | 62.0(2)   |
| O5–Sm1           | 2.367(5) |                 |           | O5–Sm1           | 2.379(5) |                 |           |
| O6–Sm1           | 2.382(5) |                 |           | O6–Sm1           | 2.377(6) |                 |           |

**Table S4.** Continuous Shape Measures calculation for Eu1 atom in **R-1-Eu**.

|          |        |                                            |
|----------|--------|--------------------------------------------|
| OP-8     | 1 D8h  | Octagon                                    |
| HPY-8    | 2 C7v  | Heptagonal pyramid                         |
| HBPY-8   | 3 D6h  | Hexagonal bipyramid                        |
| CU-8     | 4 Oh   | Cube                                       |
| SAPR-8   | 5 D4d  | Square antiprism                           |
| TDD-8    | 6 D2d  | Triangular dodecahedron                    |
| JGBF-8   | 7 D2d  | Johnson gyrobifastigium J26                |
| JETBPY-8 | 8 D3h  | Johnson elongated triangular bipyramid J14 |
| JBTPR-8  | 9 C2v  | Biaugmented trigonal prism J50             |
| BTPR-8   | 10 C2v | Biaugmented trigonal prism                 |
| JSD-8    | 11 D2d | Snub diphenoid J84                         |
| TT-8     | 12 Td  | Triakis tetrahedron                        |
| ETBPY-8  | 13 D3h | Elongated trigonal bipyrami                |

Structure [ML8] OP-8 HPY-8 HBPY-8 CU-8 **SAPR-8** TDD-8 JGBF-8 JETBPY-8 JBTPR-8 BTPR-8 JSD-8 TT-8 ETBPY-8  
 ABOXIY, 29.936, 22.050, 16.156, 9.275, **0.508**, 2.427, 16.426, 27.351, 3.021, 2.346, 5.583, 9.988, 23.197

**Table S5.** Continuous Shape Measures calculation for Sm1 atom in **R-2-Sm**

|          |        |                                            |
|----------|--------|--------------------------------------------|
| OP-8     | 1 D8h  | Octagon                                    |
| HPY-8    | 2 C7v  | Heptagonal pyramid                         |
| HBPY-8   | 3 D6h  | Hexagonal bipyramid                        |
| CU-8     | 4 Oh   | Cube                                       |
| SAPR-8   | 5 D4d  | Square antiprism                           |
| TDD-8    | 6 D2d  | Triangular dodecahedron                    |
| JGBF-8   | 7 D2d  | Johnson gyrobifastigium J26                |
| JETBPY-8 | 8 D3h  | Johnson elongated triangular bipyramid J14 |
| JBTPR-8  | 9 C2v  | Biaugmented trigonal prism J50             |
| BTPR-8   | 10 C2v | Biaugmented trigonal prism                 |
| JSD-8    | 11 D2d | Snub diphendoid J84                        |
| TT-8     | 12 Td  | Triakis tetrahedron                        |
| ETBPY-8  | 13 D3h | Elongated trigonal bipyrami                |

Structure [ML8] OP-8 HPY-8 HBPY-8 CU-8 **SAPR-8** TDD-8 JGBF-8 JETBPY-8 JBTPR-8 BTPR-8 JSD-8 TT-8 ETBPY-8  
 ABOXY, 29.909, 22.041, 16.225, 9.385, **0.510**, 2.379, 16.398, 27.342, 2.937, 2.284, 5.456, 10.063, 23.130

**Table S6** Corrected emission transition intensities<sup>a</sup> relative to  ${}^5D_0 \rightarrow {}^7F_1$  of **S-1-Eu** in the solid state and in DCM solution at room temperature

| Parameter   | $f_{0-0}$             | $f_{0-1}$  | $f_{0-2}$               | $f_{0-3}$             | $f_{0-4}$              | $f_{\text{total}}$ |
|-------------|-----------------------|------------|-------------------------|-----------------------|------------------------|--------------------|
| Solid state | 0.07 (580)<br>[0.41%] | 1.00 (590) | 13.22 (613)<br>[77.58%] | 0.34 (653)<br>[2.00%] | 2.41 (703)<br>[14.14%] | 17.04              |
| DCM         | 0.13 (580)<br>[0.63%] | 1.00 (591) | 17.31 (612)<br>[84.03%] | 0.56 (651)<br>[2.72%] | 1.60 (703)<br>[7.77%]  | 20.60              |

Values in the parentheses are the barycenter (nm) of emission transition, while the values in the square brackets are relative intensity (%) of each transition. <sup>a</sup> Estimated errors,  $\pm 5\%$ .

**Table S7** Radiative ( $A_r$ ) and nonradiative ( $A_{nr}$ ) decay rates, observed luminescence lifetime ( $\tau_{\text{obs}}$ ), radiative lifetime ( $\tau_{\text{rad}}$ ), intrinsic quantum yield ( $\Phi_{\text{Eu Eu}}$ ), overall quantum yield ( $\Phi_{\text{L Eu}}$ ) and sensitization efficiency ( $\eta_{\text{sen}}$ ) values of **S-1-Eu** in the solid state and in DCM at room temperature

| <b>S-1-Eu</b> | $A_r$ ( $s^{-1}$ ) | $A_{nr}$ ( $s^{-1}$ ) | $\tau_{\text{obs}}$ (ms) | $\tau_{\text{rad}}$ (ms) | $\Phi_{\text{Eu Eu}}$<br>(%) | $\Phi_{\text{L Eu}}$<br>(%) | $\eta_{\text{sen}}$ (%) |
|---------------|--------------------|-----------------------|--------------------------|--------------------------|------------------------------|-----------------------------|-------------------------|
| Solid state   | 930                | 327                   | 0.79                     | 1.08                     | 74                           | 59                          | 80                      |
| DCM           | 871                | 392                   | 0.80                     | 1.15                     | 69                           | 51                          | 74                      |

Estimated errors:  $A_i, \pm 5 \text{ s}^{-1}$ ;  $A_{nr}, \pm 5 \text{ s}^{-1}$ ;  $\tau_{\text{obs}}, \pm 2\%$ ;  $\tau_{\text{rad}}, \pm 10\%$ ;  $\Phi_{L \text{ Eu}}, \pm 10\%$ ;  $\Phi_{\text{Eu Eu}}, \pm 12\%$ ;  $\eta_{\text{sen}}, \pm 16\%$ .
